# Supplementary material for: Changes in growth performance, serum biochemical parameters, rumen microbiota structure, and metabolism in yaks following rumen fluid- fermented roughage intervention
Source: Research Square preprint supplement (doi:10.21203/rs.3.rs-8367578/v1), 2026-01-16
Supplement: Supplementary file 1 [file cf2e66670c93d3a7ee4719f0.docx]

Table S1 Effect of rumen fluid-fermented roughage on yak rumen microorganisms at gate level

| Items | CG | FRG | *P*-Value |
| --- | --- | --- | --- |
| Firmicutes | 41.52±9.21a | 60.81±10.55b | 0.022 |
| Bacteroidota | 52.70±8.87a | 30.72±2.21b | 0.015 |
| Proteobacteria | 3.83±0.31a | 1.41±0.12b | 0.038 |
| Cyanobacteria | 0.32±0.02a | 0.14±0.06b | 0.049 |
| Euryarchaeota | 0.42±0.02 | 0.58±0.06 | 0.682 |
| Spirochaetota | 0.43±0.06b | 0.93±0.10a | 0.047 |
| Patescibacteria | 2.13±0.11a | 0.79±0.09b | 0.020 |
| Actinobacteriota | 0.26±0.03 | 0.47±0.04 | 0.319 |
| Fibrobacterota | 0.04±0.00b | 0.43±0.04a | 0.027 |
| Desulfobacterota | 0.22±0.02 | 0.30±0.02 | 0.650 |

Table S2 Effect of rumen fluid fermented crude material on yak rumen microorganisms at genus level

| Items | CG | FRG | *P-*Value |
| --- | --- | --- | --- |
| Prevotella | 12.10±2.89 | 21.20±2.52 | 0.139 |
| Rikenellaceae_RC9_gut_group | 4.75±1.37 | 5.94±1.85 | 0.566 |
| Christensenellaceae_R-7_group | 5.31±1.80 | 4.48±1.14 | 0.683 |
| NK4A214_group | 2.74±0.45 | 4.42±0.90 | 0.394 |
| Ruminococcus | 3.48±0.70 | 2.24±0.42 | 0.431 |
| Oscillospira | 6.29±3.07A | 0.01±0.00B | 0.001 |
| Succiniclasticum | 0.93±0.19B | 4.17±1.14A | 0.006 |
| [Eubacterium]_ventriosum_group | 6.58±2.63a | 0.84±0.51b | 0.026 |
| Chryseobacterium | 4.92±0.40A | 0.01±0.00B | 0.001 |
| Saccharofermentans | 1.20±0.30 | 1.70±0.44 | 0.278 |

Table S3 Metabolic pathways and associated differential metabolites (positive ion patterns)

| No. | Metabolic pathways | Differential metabolites | *P-*value |
| --- | --- | --- | --- |
| 1 | Biosynthesis of unsaturated fatty acids | Docosahexaenoic acid↓; 11(Z),14(Z),17(Z)-Eicosatrienoic acid↓; | 0.071 |
| 2 | Parkinson's disease | Adenosine↓; | 0.078 |
| 3 | Alcoholism | Adenosine↓; | 0.078 |
| 4 | Retrograde endocannabinoid signaling | 2-Arachidonoyl glycerol↑;  PE 28:0↑; | 0.120 |
| 5 | Vitamin digestion and absorption | Nicotinamide↓;  Vitamin A↑; | 0.148 |
| 6 | Oxidative phosphorylation | Coenzyme Q2↓; | 0.150 |
| 7 | Longevity regulating pathway - worm | Nicotinamide↓; | 0.150 |
| 8 | Morphine addiction | Adenosine↓; | 0.150 |
| 9 | Retinol metabolism | Vitamin A↑; | 0.216 |
| 10 | Isoflavonoid biosynthesis | Coumestrol↓; | 0.216 |
| 11 | Two-component system | Coenzyme Q2↓; | 0.216 |
| 12 | Sphingolipid signaling pathway | Adenosine↓; | 0.216 |
| 13 | Insulin resistance | Acetylcarnitine↓; | 0.216 |
| 14 | Vascular smooth muscle contraction | Adenosine↓; | 0.278 |
| 15 | Pathogenic Escherichia coli infection | PE 28:0↑; | 0.278 |
| 16 | Kaposi's sarcoma-associated herpesvirus infection | PE 28:0↑; | 0.278 |
| 17 | Neuroactive ligand-receptor interaction | Adenosine↓;  2-Arachidonoyl glycerol↑; | 0.297 |
| 18 | Lysine degradation | 5-Aminovaleric acid↑; | 0.335 |
| 19 | Glycosylphosphatidylinositol (GPI)-anchor biosynthesis | PE 28:0↑; | 0.335 |
| 20 | cGMP-PKG signaling pathway | Adenosine↓; | 0.335 |

Note: ↑: Arrows indicate that metabolites are up-regulated in the FRG group; ↓: Arrows indicate that metabolites are down-regulated in the FRG group. Same as in the table below.

Table S4 Metabolic pathways and associated differential metabolites (negative ion model)

| No. | Metabolic pathways | Differential metabolites | *P-*value |
| --- | --- | --- | --- |
| 1 | Flavonoid biosynthesis | Apigenin↑;  Naringenin↑;  Hesperetin ↓;  Epicatechin↓; | <0.001 |
| 2 | Isoflavonoid biosynthesis | Apigenin↑;  Naringenin↑;  Genistein↑; | 0.014 |
| 3 | Bile secretion | Quinine↓; Hydrocortisone↓; Glycocholic acid↑; Deoxycholic Acid↑; | 0.025 |
| 4 | Biosynthesis of phenylpropanoids | Apigenin↑;  Naringenin↑;  Genistein↑;  Epicatechin↓;  Resveratrol↓; | 0.040 |
| 5 | Carbon metabolism | Gluconolactone↑; D-Gluconic acid↑; D-Sedoheptulose 7-phosphate↑; O-Phospho-L-serine↑; | 0.059 |
| 6 | Pentose phosphate pathway | Gluconolactone↑; D-Gluconic acid↑; D-Sedoheptulose 7-phosphate↑; | 0.086 |
| 7 | Biosynthesis of secondary metabolites | Apigenin↑; Gluconolactone↑; Naringenin↑;  XMP↑;  D-Gluconic acid↑; D-Sedoheptulose 7-phosphate↑;  Genistein↑;  Xanthosine↑;  Epicatechin↓; L-Ascorbate↑;  Resveratrol↓; | 0.114 |
| 8 | Caffeine metabolism | Xanthosine↑; | 0.163 |
| 9 | Glycine, serine and threonine metabolism | O-Phospho-L-serine↑; | 0.163 |
| 10 | Cysteine and methionine metabolism | O-Phospho-L-serine↑; | 0.163 |
| 11 | Flavone and flavonol biosynthesis | Apigenin↑; | 0.163 |
| 12 | Cholesterol metabolism | Glycocholic acid↑; | 0.163 |
| 13 | Prostate cancer | Hydrocortisone↓; | 0.163 |
| 14 | Secondary bile acid biosynthesis | Glycocholic acid↑; Deoxycholic Acid↑; | 0.187 |
| 15 | Lipopolysaccharide biosynthesis | D-Sedoheptulose 7-phosphate↑; | 0.300 |
| 16 | Linoleic acid metabolism | (+/-)12(13)-DiHOME↑; | 0.300 |
| 17 | Stilbenoid, diarylheptanoid and gingerol biosynthesis | Resveratrol↓; | 0.300 |
| 18 | Aminoacyl-tRNA biosynthesis | O-Phospho-L-serine↑; | 0.300 |
| 19 | Longevity regulating pathway | Resveratrol↓; | 0.300 |
| 20 | Longevity regulating pathway - worm | Resveratrol↓; | 0.300 |

Note: ↑: Arrows indicate that metabolites are up-regulated in the FRG group; ↓: Arrows indicate that metabolites are down-regulated in the FRG group. Same as in the table below.
